# Supplementary material
Source: PubMed Central journal article supplement (PMC7205592)
Supplement: NIHMS1562318-supplement-2.pdf [file NIHMS1562318-supplement-2.pdf]

## SUPPLEMENTAL INFORMATION

**Supplementary Table 1.** List of plasmid constructs used in this work. Blue and red colors mark positively and negatively charged AAs that are varied between the different constructs.

| Plasmid          | Protein sequence                                                                                                                                                                                                                                                                                                                                                                                                          | Size (AA) | Net charge <sup>a</sup> | Net charge <sup>b</sup> |
|------------------|---------------------------------------------------------------------------------------------------------------------------------------------------------------------------------------------------------------------------------------------------------------------------------------------------------------------------------------------------------------------------------------------------------------------------|-----------|-------------------------|-------------------------|
| mEos3.2 -C1      | mEos3.2-SGL <b>RSRA</b> QASNSA <b>VD</b> GTAGPGSTG <b>SR</b><br>(mEos3.2 =<br>MSAIKPDMKIKLRMEGNVNGHHFVIDGDGTGKPFEGKQSM <sup>D</sup> LE<br>VK <b>E</b> GGPLPFAFDILTAFHYGNRVFAKYPDNIQDYFKQSF <sup>P</sup> KG <sup>Y</sup><br>SWERSLTFEDGGICNARN <sup>D</sup> ITMEGDTFYNKVRFYGTNFPANGPV<br>MQKKT <b>L</b> KWEPSTEKMYVRDGVLTGDIEMALLLEGNAHYRCDF<br>RTTYKAKEKGVKLPGAHFVDHCIEILSHDK <b>D</b> YNKVKLYEHAVA<br>HSGLPDNARR)        | 252       | +2.2                    | +2.5                    |
| mEos3.2 -NLS     | mEos3.2-SGL <b>RSRA</b> D <b>P</b> KKK <b>RK</b> V <b>D</b> P <b>K</b> KK <b>RK</b> V <b>D</b> P <b>K</b> KK <b>RK</b> VGSTG <b>SR</b>                                                                                                                                                                                                                                                                                    | 262       | +15.2                   | +15.5                   |
| mEos3.2 (-14)    | mEos3.2-<br>SGL <b>RSRA</b> QASNS <b>DEDEEDDEDEEDDED</b> NSA <b>V</b> DTAGPGSTG <b>SR</b>                                                                                                                                                                                                                                                                                                                                 | 270       | -13.8                   | -13.4                   |
| mEos3.2 (-7)     | mEos3.2-SGL <b>RSRA</b> QASNS <b>DEDEEDDEE</b> NSA <b>V</b> DTAGPGSTG <b>SR</b>                                                                                                                                                                                                                                                                                                                                           | 263       | -6.8                    | -6.5                    |
| mEos3.2 (0)      | mEos3.2-SGL <b>RSRA</b> QASNS <b>DE</b> STQNSA <b>V</b> DTAGPGSTG <b>SR</b>                                                                                                                                                                                                                                                                                                                                               | 259       | +0.2                    | +0.5                    |
| mEos3.2 (+7A)    | mEos3.2-SGL <b>RSRA</b> QASNS <b>K</b> KK <b>R</b> NSA <b>V</b> DTAGPGSTG <b>SR</b>                                                                                                                                                                                                                                                                                                                                       | 259       | +7.2                    | +7.5                    |
| mEos3.2 (+14)    | mEos3.2-<br>SGL <b>RSRA</b> QASNS <b>K</b> KK <b>R</b> KK <b>R</b> KK <b>R</b> NSA <b>V</b> DTAGPGSTG <b>SR</b>                                                                                                                                                                                                                                                                                                           | 266       | +14.2                   | +14.5                   |
| mEos3.2 (+7B)    | mEos3.2- SGR <b>Q</b> K <b>G</b> H <b>K</b> CIRLP <b>K</b> VN <b>Q</b> RMS <b>R</b>                                                                                                                                                                                                                                                                                                                                       | 247       | +7.2                    | +7.5                    |
| mEosP5- C1 (+7C) | mEosP5-SGL <b>RSRA</b> QASNSA <b>V</b> DTAGPGSTG <b>SR</b><br>(mEosP5 =<br>M <b>K</b> SAIKPDMKIKLRMEGNVNGHHFVIDGDGTGKPFEGKQSM <sup>D</sup> LE<br>VK <b>K</b> GGPLPFAFDILTAFHYGNRVFAKYPDNIQDYFKQSF <sup>P</sup> KG <sup>Y</sup><br>SWERSLTFEDGGICNARN <sup>D</sup> ITMEGDTFYNKVRFYGTNFPANGPV<br>MQKKT <b>L</b> KWEPSTEKMYVRDGVLTGDIEMALLLEGNAHYRCDF<br>RTTYKAKEKGVKLPGAHFVDHCIEILSHDK <b>K</b> YNKVKLYEHAVA<br>HSGLPDNARR) | 253       | +7.2                    | +7.5                    |
| mEmerald -C1     | MVSKGEELFTGVVPILVELDGDVNGHKFSVSGEGEGDATY <b>G</b> KL<br>TLKFICTTGKLPVPWPTLVTTLYGVQCFARYPDHMKQHDF <b>F</b> KS<br>AMPEGYVQERTIFFKDDGNYKTRAEVKFEGDTLVNRIELKGID <b>F</b><br>KEDGNILGHKLEYNYN <b>S</b> HKVYITADKQKNGIKVN <b>F</b> KTRHNIED <b>G</b><br>SVQLADHYQQNTPIGDGPVLLPDNHYLSTQSKLSKDPNEK <b>R</b> DH<br>MVLLEFVTAAGITLGMDELYK <b>S</b> GLRSRAQASNSA <b>V</b> DTAG <b>P</b> S<br>T <b>G</b> SR                           | 265       | -3.7                    | -3.4                    |

a: Calculated by summing the charges of each amino acid at pH 7.4 (ref 1): lysine = +0.999; arginine = +1.000; histidine = +0.048; glutamic acid = -0.999; aspartic acid = -1.000; cysteine = -0.085, and all other amino acids = 0.000.

b: Calculated by Protein Calculator v3.4 (<http://protcalc.sourceforge.net/>) for pH 7.4.

**Supplementary Table 2.** List of estimated net charges for the most abundant (>0.2% of total protein mass) cytoplasmic proteins, based on proteomics of the U2OS human cell line<sup>2,3</sup>. Protein sequences are from UniProt (<https://www.uniprot.org/>). Net charges are estimated for pH 7.4 using Protein Calculator (<http://protcalc.sourceforge.net/>). For each category, proteins are listed in the order of mass abundance (% of the total protein mass of the cell). This showed that most proteins in the categories of “cytoskeletal proteins”, “chaperones and folding catalysts”, and “others” are either strongly negatively charged (<-10) or neutral (within ±2). Half of the proteins in the “glycolysis” group are mildly (~+3) positive, possibly for their intended interactions with the negatively charged, phosphorylated glucose metabolites, which thereby neutralizing the total charge. Three proteins in the group of “ribosome” and one in “translation factors” are strongly positively charged, but these positive charges are more than compensated by their binding partner, the heavily negatively charged RNA<sup>4,5</sup>.

#### Cytoskeletal proteins & regulators

| Name   | %mass | Net charge |
|--------|-------|------------|
| Vim    | 2.7   | -18.6      |
| TubA1c | 2.2   | -22.7      |
| ActB   | 2.2   | -11.7      |
| Cfl1   | 1.2   | 1.6        |
| FlnA   | 0.84  | -50.8      |
| Plec   | 0.83  | -76.9      |
| myh9   | 0.71  | -45.9      |
| pfn1   | 0.68  | 1.8        |
| FlnB   | 0.36  | -60.9      |
| FlnC   | 0.32  | -54.6      |
| TubB6  | 0.30  | -24.7      |
| LmnA   | 0.29  | -2.1       |
| Myl6   | 0.28  | -14.0      |
| SptAn1 | 0.27  | -106.4     |

#### Chaperones and folding catalysts

| Name     | %mass | Net charge |
|----------|-------|------------|
| Hsp90ab1 | 2.2   | -39.3      |
| HspA8    | 2.0   | -12.8      |
| cct2     | 1.1   | -7.9       |
| PPIA     | 0.97  | 0.9        |
| HspD1    | 0.89  | -5.2       |
| HspB1    | 0.60  | -2.7       |
| cct6a    | 0.40  | -4.5       |
| cct5     | 0.20  | -13.6      |

#### Glycolysis

| Name  | %mass | Net charge |
|-------|-------|------------|
| Pkm2  | 3.1   | 2.4        |
| Eno1  | 2.5   | 0.0        |
| GAPDH | 2.0   | 3.6        |
| Tpi1  | 1.7   | -5.0       |
| AldOa | 1.1   | 3.2        |
| Pgk1  | 0.85  | 2.8        |
| LdhA  | 0.53  | 3.2        |
| Eno3  | 0.48  | 1.1        |
| Eno2  | 0.22  | -18.0      |

#### Ribosome

| Name   | %mass | Net charge |
|--------|-------|------------|
| Rpl37a | 0.54  | 18.7       |
| Rps15a | 0.26  | 10.1       |
| Rpl7a  | 0.25  | 40.9       |
| RplP0  | 0.20  | -4.0       |

#### Translation factors

| Name   | %mass | Net charge |
|--------|-------|------------|
| Eef1a1 | 2.7   | 11.4       |
| Eef2   | 1.1   | -4.8       |
| Eif5a  | 0.50  | -7.1       |
| Eef1d  | 0.39  | -14.8      |

#### Others

| Name   | %mass | Net charge |
|--------|-------|------------|
| Mif    | 1.9   | 0.8        |
| LgaLs1 | 0.79  | -3.4       |
| Tkt    | 0.47  | 1.7        |
| Cltc   | 0.38  | -39.8      |
| GstP1  | 0.33  | -3.3       |
| Eif4a1 | 0.26  | -9.0       |
| FasN   | 0.23  | -34.1      |

## REFERENCES FOR SUPPLEMENTAL INFORMATION

1. Requiao, R. D. *et al.* Protein charge distribution in proteomes and its impact on translation. *PLoS Comput. Biol.* **13**, e1005549 (2017).
2. Beck, M. *et al.* The quantitative proteome of a human cell line. *Mol. Syst. Biol.* **7**, 549 (2011).
3. Liebermeister, W. *et al.* Visual account of protein investment in cellular functions. *Proc. Natl. Acad. Sci. U. S. A.* **111**, 8488-8493 (2014).
4. Knight, A. M. *et al.* Electrostatic effect of the ribosomal surface on nascent polypeptide dynamics. *ACS Chem. Biol.* **8**, 1195-1204 (2013).
5. Schavemaker, P. E., Smigiel, W. M. & Poolman, B. Ribosome surface properties may impose limits on the nature of the cytoplasmic proteome. *eLife* **6**, e30084 (2017).
